# Supplementary material for: The Establishment of a Mouse Model of Recurrent Primary Dysmenorrhea
Source: MDPI journal article supplement (doi:10.3390/ijms23116128), 2022-05-30
Supplement: s1 [file s1]

**Table S2.** Identification of sharing differential metabolites in serum.

|          | No | m/z      | RT<br>(min) | Metabolites                                                 | HMDB ID     | M4 vs. Control  |      |      | M8 vs. Control  |      |      |                                   |
|----------|----|----------|-------------|-------------------------------------------------------------|-------------|-----------------|------|------|-----------------|------|------|-----------------------------------|
|          |    |          |             |                                                             |             | <i>p</i> -value | VIP  | FC   | <i>p</i> -value | VIP  | FC   |                                   |
| positive | 1  | 519.6515 | 17.91       | LysoPC(18:2(9Z,12Z)/0:0)                                    | HMDB10386   | <0.001          | 4.76 | 0.92 | <0.001          | 9.29 | 0.85 | LYPLA1, PLA2G15,<br>PLA2G5        |
|          | 2  | 543.6729 | 17.87       | LysoPC(20:4(8Z,11Z,14Z,17Z)/0:0)                            | HMDB0010396 | <0.001          | 4.18 | 0.89 | 0.045           | 1.69 | 0.98 | LYPLA1, PLA2G15,<br>PLA2G5        |
|          | 3  | 521.6673 | 18.68       | LysoPC(18:1(11Z)/0:0)                                       | HMDB0010385 | <0.001          | 6.52 | 0.73 | 0.002           | 2.90 | 0.96 | LYPLA1, PLA2G15,<br>PLA2G5        |
|          | 4  | 987.589  | 17.87       | Triacylglycerol                                             | HMDB0049505 | <0.001          | 3.17 | 0.80 | <0.001          | 3.41 | 0.86 | PNLIP, LIPC, LIPA,<br>LIPG, DGAT1 |
|          | 5  | 675.092  | 26.3        | Diacylglycerol                                              | HMDB0056222 | <0.001          | 3.40 | 0.30 | <0.001          | 3.68 | 0.48 | DGKQ, PNLIP,<br>PLCB1, DGKG       |
|          | 6  | 567.3324 | 17.91       | LysoPC(22:6)                                                | HMDB0010404 | <0.001          | 4.65 | 1.28 | <0.001          | 4.76 | 1.17 | LYPLA1, PLA2G15,<br>PLA2G5        |
|          | 7  | 507.6838 | 18.09       | LysoPC(P-18:0/0:0)                                          | HMDB0013122 | <0.001          | 1.37 | 0.88 | 0.002           | 1.06 | 0.95 | PLA2G4A, LCAT,<br>CLC, LPCAT3     |
|          | 8  | 396.6484 | 9.19        | Ergocalciferol                                              | HMDB0000900 | <0.001          | 2.55 | 1.27 | <0.001          | 3.16 | 0.76 | CYP3A4, CYP27A1,<br>VDR, CMPK2    |
|          | 9  | 338.4816 | 26.3        | 8,9-DiHETrE                                                 | HMDB0002311 | 0.048           | 2.52 | 0.77 | 0.028           | 3.33 | 0.79 | EPHX2                             |
|          | 10 | 525.6145 | 17.62       | LysoPE(22:6(4Z,7Z,10Z,13Z,16Z,19Z)/0:0)                     | HMDB0011526 | <0.001          | 3.46 | 1.61 | <0.001          | 3.74 | 1.41 | ENPP2                             |
|          | 11 | 1391.919 | 14.71       | Cardiolipin(67:2)                                           | HMDB0080408 | <0.001          | 1.44 | 0.91 | <0.001          | 1.46 | 0.94 | CRLS1                             |
|          | 12 | 706.942  | 14.71       | Phosphatidate(37:6)                                         | HMDB0115403 | <0.001          | 1.62 | 0.90 | <0.001          | 1.77 | 0.93 | PLD2, DGKQ,<br>PPAP2C             |
|          | 13 | 941.52   | 18.63       | TG(22:6(4Z,7Z,10Z,13Z,16Z,19Z)/20:4(5Z,8Z,11Z,14Z,17Z)/0:0) | HMDB0055932 | <0.001          | 2.88 | 0.52 | 0.001           | 2.35 | 0.78 | PNLIP, LIPC, LIPA,                |

|    |          |       |                                                    |             |        |      |      |        |      |      |                                    |
|----|----------|-------|----------------------------------------------------|-------------|--------|------|------|--------|------|------|------------------------------------|
|    |          |       | 4Z)/O-18:0)                                        |             |        |      |      |        |      |      | LIPG                               |
| 14 | 204.2252 | 1.02  | (±)-Tryptophan                                     | HMDB0030396 | <0.001 | 2.31 | 0.71 | <0.001 | 2.14 | 0.85 | -                                  |
| 15 | 256.254  | 19.17 | 3-hydroxy-3-(2,3,4-trimethoxyphenyl)propanoic acid | HMDB0142079 | 0.001  | 1.42 | 1.34 | <0.001 | 1.86 | 0.69 | -                                  |
| 16 | 1162.22  | 14.71 | 3-Hydroxyhexacosanoyl-CoA                          | HMDB0062351 | 0.002  | 1.48 | 0.88 | <0.001 | 1.48 | 0.92 | -                                  |
| 17 | 302.3649 | 18.76 | Enterodiol                                         | HMDB0005056 | <0.001 | 1.70 | 1.33 | <0.001 | 1.32 | 1.12 | -                                  |
| 18 | 782.0817 | 28.78 | PC(18:2(9Z,12Z)/18:2(9Z,12Z))                      | HMDB0008138 | 0.001  | 1.34 | 0.62 | <0.001 | 2.25 | 0.44 | LYPLA1, PLA2G15, PLA2G5            |
| 19 | 1111.694 | 17.88 | -                                                  | -           | <0.001 | 1.07 | 1.10 | <0.001 | 1.92 | 1.18 | -                                  |
| 20 | 545.348  | 18.34 | LysoPC(20:3)                                       | HMDB0010393 | <0.001 | 1.34 | 0.84 | <0.001 | 1.69 | 0.85 | LYPLA1, PLA2G15, PLA2G5            |
| 21 | 1089.18  | 14.71 | -                                                  | -           | <0.001 | 1.35 | 0.85 | <0.001 | 2.24 | 0.76 | -                                  |
| 22 | 1089.304 | 14.71 | -                                                  | -           | <0.001 | 1.16 | 0.88 | <0.001 | 1.31 | 0.91 | -                                  |
| 23 | 1089.429 | 14.71 | -                                                  | -           | <0.001 | 1.24 | 0.87 | <0.001 | 1.59 | 0.88 | -                                  |
| 24 | 1089.548 | 14.71 | -                                                  | -           | <0.001 | 1.11 | 0.89 | <0.001 | 1.83 | 0.84 | -                                  |
| 25 | 1415.941 | 14.92 | CL(i-12:0/18:2(9Z,11Z)/18:2(9Z,11Z)/i-21:0)        | HMDB0080752 | <0.001 | 2.20 | 0.50 | <0.001 | 2.52 | 1.39 | CRLS1                              |
| 26 | 1047.088 | 14.59 | Phosphatidylinositol diphosphate(38:4)             | HMDB0010070 | <0.001 | 1.26 | 1.20 | <0.001 | 1.29 | 1.13 | PLCB1, PLCG2, PI3L                 |
| 27 | 1050.174 | 14.59 | CDP-DG(40:8)                                       | HMDB0116007 | <0.001 | 1.43 | 1.26 | <0.001 | 1.62 | 1.20 | CDS2                               |
| 28 | 211.1131 | 0.76  | Phosphocreatine                                    | HMDB0001511 | <0.001 | 1.59 | 0.65 | <0.001 | 2.32 | 0.57 | CKMT2, CKB, CKMT1A, CKM            |
| 29 | 1008.178 | 14.59 | CDP-DG(36:1)                                       | HMDB0006987 | <0.001 | 1.49 | 1.31 | <0.001 | 1.59 | 1.21 | CDS2, CDS1, CDIPT, PGS1            |
| 30 | 1490.108 | 14.92 | Cardiolipin(74:2)                                  | HMDB0081537 | <0.001 | 2.15 | 0.48 | <0.001 | 1.67 | 1.20 | CRLS1                              |
| 31 | 328.4883 | 22.04 | Docosaheptaenoic acid                              | HMDB0002183 | <0.001 | 1.15 | 1.48 | <0.001 | 1.36 | 1.33 | ACOT7, ACOT2, ACOT4, CYP2U1, ACOT1 |

|          |    |          |       |                                                            |             |        |      |      |        |      |      |                                          |
|----------|----|----------|-------|------------------------------------------------------------|-------------|--------|------|------|--------|------|------|------------------------------------------|
|          | 32 | 537.3794 | 21.2  | LysoPE(0:0/22:0)                                           | HMDB0011490 | <0.001 | 1.40 | 0.69 | <0.001 | 1.25 | 0.68 | ENPP2                                    |
|          | 33 | 1396.488 | 14.88 | nLc6Cer                                                    | HMDB0062507 | <0.001 | 1.57 | 0.65 | <0.001 | 1.10 | 1.11 | -                                        |
|          | 34 | 1475.996 | 14.88 | CL(18:2(9Z,12Z)/16:0/22:5(4Z,7Z,10Z,13Z,16Z)/18:2(9Z,12Z)) | HMDB0058708 | <0.001 | 1.37 | 0.63 | <0.001 | 1.31 | 1.20 | CRLS1                                    |
| negative | 35 | 328.4883 | 22.08 | Docosaehaenoic acid                                        | HMDB0002183 | <0.001 | 5.05 | 1.44 | <0.001 | 4.12 | 1.30 | ACOT7, ACOT2,<br>ACOT4, CYP2U1,<br>ACOT1 |
|          | 36 | 256.4241 | 23.56 | Palmitic acid                                              | HMDB0000220 | <0.001 | 1.78 | 0.87 | 0.004  | 1.42 | 0.91 | FASN, LYPLA1,<br>PLA2G5                  |
|          | 37 | 565.763  | 17.95 | LysoPE(24:0)                                               | HMDB0011527 | <0.001 | 4.71 | 0.91 | <0.001 | 6.67 | 0.85 | ENPP2                                    |
|          | 38 | 587.5345 | 27.9  | N-Acetyl-D-glucosaminyldiphosphodolichol                   | HMDB0001445 | <0.001 | 2.26 | 3.67 | 0.001  | 1.26 | 2.03 | DPAGT1, ALG13                            |
|          | 39 | 592.946  | 17.96 | Diacylglycerol                                             | HMDB0056138 | <0.001 | 3.84 | 1.30 | <0.001 | 3.84 | 1.29 | DGKQ, PNLIP,<br>PLCB1, LIPA              |
|          | 40 | 1101.384 | 17.95 | Cardiolipin(42:0)                                          | HMDB0116973 | <0.001 | 2.02 | 0.86 | <0.001 | 2.68 | 0.78 | -                                        |
|          | 41 | 282.468  | 24.06 | Octadec-9-enoic Acid                                       | HMDB0062703 | <0.001 | 1.62 | 0.90 | <0.001 | 2.05 | 0.87 | -                                        |
|          | 42 | 1091.742 | 20.1  | -                                                          | -           | <0.001 | 3.11 | 0.63 | <0.001 | 2.49 | 1.16 | -                                        |
|          | 43 | 320.4663 | 18.8  | 5-HETE                                                     | HMDB0011134 | <0.001 | 3.93 | 1.24 | 0.001  | 2.74 | 1.13 | GPX7, GPX5, GPX6                         |
|          | 44 | 304.4669 | 22.29 | Arachidonic acid                                           | HMDB0001043 | <0.001 | 2.93 | 0.74 | 0.005  | 1.33 | 1.02 | FASN, PLA2G5                             |
|          | 45 | 592.946  | 20.1  | Diglyceride                                                | HMDB0056157 | <0.001 | 1.39 | 0.82 | <0.001 | 1.24 | 1.09 | DGKQ, PNLIP, PLCB1                       |
|          | 46 | 643.006  | 22.08 | Diacylglycerol(38:5)                                       | HMDB0056315 | <0.001 | 1.67 | 1.75 | <0.001 | 1.30 | 1.47 | DGKQ, PNLIP, PLCB1                       |
|          | 47 | 254.2823 | 21.66 | Aldosine                                                   | HMDB0037817 | <0.001 | 1.52 | 0.75 | <0.001 | 1.47 | 0.77 | -                                        |
|          | 48 | 1107.677 | 17.91 | -                                                          | -           | <0.001 | 2.06 | 0.84 | <0.001 | 1.84 | 0.87 | -                                        |
|          | 49 | 521.608  | 18.71 | Morphiceptin                                               | HMDB0005777 | <0.001 | 1.82 | 0.55 | <0.001 | 1.01 | 0.81 | -                                        |
|          | 50 | 503.609  | 17.54 | LysoPE(20:3)                                               | HMDB0011516 | <0.001 | 1.92 | 0.76 | <0.001 | 1.17 | 0.88 | ENPP2                                    |

|    |          |       |                                                   |             |        |      |      |        |      |      |                                 |
|----|----------|-------|---------------------------------------------------|-------------|--------|------|------|--------|------|------|---------------------------------|
| 51 | 378.5454 | 16.61 | b-Monoacylglycerol                                | HMDB0004666 | <0.001 | 1.02 | 0.45 | <0.001 | 1.24 | 0.27 | MGLL, LIPE,<br>MOGAT2, ACP6     |
| 52 | 344.4877 | 24.03 | 16(17)-EpDPE                                      | HMDB0013621 | <0.001 | 1.18 | 0.76 | <0.001 | 1.15 | 0.78 | -                               |
| 53 | 555.6227 | 17.66 | Enkephalin L                                      | HMDB0001045 | <0.001 | 1.06 | 1.59 | <0.001 | 1.11 | 1.61 | -                               |
| 54 | 1480.113 | 18.54 | Cardiolipin(68:0)                                 | HMDB0124210 | <0.001 | 3.50 | 1.61 | <0.001 | 3.73 | 1.64 | -                               |
| 55 | 90.0779  | 0.64  | Hydroxypropionic acid                             | HMDB0000700 | <0.001 | 2.15 | 0.81 | 0.004  | 1.09 | 0.92 | HIBCH                           |
| 56 | 130.1418 | 1.71  | Ketoleucine                                       | HMDB0000695 | <0.001 | 2.36 | 1.28 | <0.001 | 2.62 | 0.76 | BCKDH8, BCKDHA,<br>BCAT1, BCAT2 |
| 57 | 764.0664 | 22.08 | PC(36:6)                                          | HMDB0011280 | <0.001 | 2.31 | 1.26 | <0.001 | 2.62 | 0.76 | PLA2G5, PLA2G2F,<br>LCAT        |
| 58 | 768.07   | 12.56 | dimethylphosphatidylethanolamine                  | HMDB0114046 | 0.005  | 1.42 | 1.10 | 0.01   | 1.20 | 0.95 | PEMT                            |
| 59 | 362.44   | 24.07 | [(5-oxo-1,7-diphenylheptan-3-yl)oxy]sulfonic acid | HMDB0134658 | <0.001 | 1.03 | 2.40 | <0.001 | 1.49 | 3.57 | -                               |
| 60 | 1031.249 | 14.79 | Cardiolipin(38:0)                                 | HMDB0116873 | <0.001 | 1.32 | 1.89 | <0.001 | 1.16 | 1.68 | -                               |
| 61 | 676.9908 | 29.12 | Sphingomyelin                                     | HMDB0012085 | <0.001 | 1.34 | 1.26 | <0.001 | 1.16 | 0.42 | GBGT1, PIGL, SMPD1,<br>B3GAT1   |
