# Supplementary material for: The Establishment of a Mouse Model of Recurrent Primary Dysmenorrhea
Source: MDPI journal article supplement (doi:10.3390/ijms23116128), 2022-05-30
Supplement: s1 [file s1]

**Table S3.** RSD of typical peaks of QC sample (ESI<sup>+</sup>, n=10; ESI<sup>-</sup>, n=10).

| Ion Mode | MS       | RSD (%)        |                |
|----------|----------|----------------|----------------|
|          |          | Retention Time | Peak Intensity |
| positive | 104.1086 | 1.2110         | 0.9164         |
|          | 274.2775 | 0.0269         | 0.4353         |
|          | 520.3501 | 0.0054         | 0.4324         |
|          | 496.3495 | 0.0089         | 0.3436         |
|          | 524.3811 | 0.0048         | 0.8755         |
| negative | 89.023   | 0.3924         | 0.2353         |
|          | 564.3254 | 0.0161         | 0.8796         |
|          | 540.3253 | 0.0162         | 1.0242         |
|          | 568.3566 | 0.0143         | 1.6701         |
|          | 281.2451 | 0.0124         | 1.2774         |
