# Supplementary material for: The Establishment of a Mouse Model of Recurrent Primary Dysmenorrhea
Source: MDPI journal article supplement (doi:10.3390/ijms23116128), 2022-05-30
Supplement: s1 [file s1]

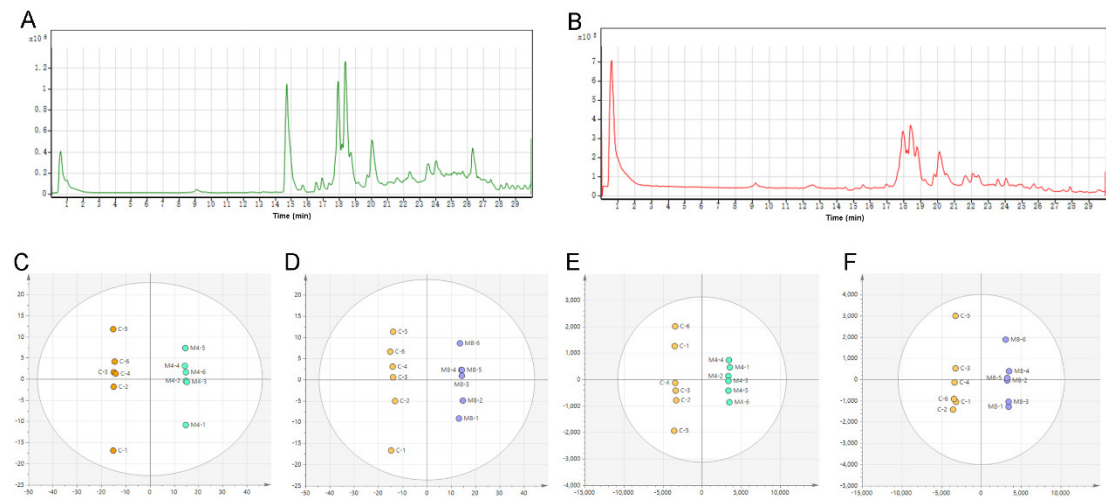

**Figure S1.** TICs and score plots from serum metabolomics analysis. (A) Typical positive TIC of QC sample. (B) Typical negative TIC of QC sample. (C,D) OPLS-DA score of control vs. M4 and control vs. M8 (positive mode). (E,F) OPLS-DA score of control vs. M4 and control vs. M8 (negative mode). (n = 6 per group).
