# Supplementary material for: The Establishment of a Mouse Model of Recurrent Primary Dysmenorrhea
Source: MDPI journal article supplement (doi:10.3390/ijms23116128), 2022-05-30
Supplement: s1 [file s1]

**Table S1.** The statistical values of PD-related features.

|                                            | 4 <sup>th</sup> day |                  | 8 <sup>th</sup> day |                  | 12 <sup>th</sup> day |                                | 16 <sup>th</sup> day |                                |
|--------------------------------------------|---------------------|------------------|---------------------|------------------|----------------------|--------------------------------|----------------------|--------------------------------|
|                                            | control             | model            | control             | model            | control              | model                          | control              | model                          |
| Cumulative writhing score                  | 3.208±0.943         | 21.476±3.518**   | 2.556±0.836         | 19.167±1.671**   | 2.75±0.851           | 10.500±2.554*                  | 4.000±1.491          | 4.500±1.791 <sup>n.s.</sup>    |
| Uterus index                               | 0.340±0.087         | 0.654±0.065**    | 0.317±0.046         | 0.554±0.031**    | 0.319±0.041          | 0.470±0.059 <sup>n.s.</sup>    | 0.409±0.031          | 0.447±0.043 <sup>n.s.</sup>    |
| Pathological scores                        | 0±0                 | 5.5±0.471**      | 0.333±0.272         | 5.667±0.245**    | 0.750±0.312          | 3±0.118*                       | 0.667±0.272          | 1.583±0.245 <sup>n.s.</sup>    |
| serum PGF <sub>2α</sub> (pg/ml)            | 103.137±9.051       | 290.114±31.525** | 83.137±10.363       | 238.578±27.095** | 142.5095±17.64       | 188.039±16.527 <sup>n.s.</sup> | 169.902±9.327        | 171.029±10.201 <sup>n.s.</sup> |
| Serum PGE <sub>2</sub> (pg/ml)             | 397.227±9.508       | 352.218±8.221*   | 383.167±9.475       | 339.894±3.640**  | 388.545±12.123       | 358.272±11.563 <sup>n.s.</sup> | 389.182±7.270        | 362.291±4.744*                 |
| Serum PGF <sub>2α</sub> /PGE <sub>2</sub>  | 0.259±0.020         | 0.878±0.099**    | 0.219±0.030         | 0.701±0.079**    | 0.370±0.044          | 0.507±0.047 <sup>n.s.</sup>    | 0.437±0.025          | 0.471±0.026 <sup>n.s.</sup>    |
| uterus PGF <sub>2α</sub> (pg/ml)           | 110.099±3.524       | 197.333±12.043** | 125.259±5.587       | 181.679±17.336*  | 107.951±6.784        | 172.099±11.307**               | 125.155±4.882        | 137.985±14.272 <sup>n.s.</sup> |
| uterus PGE <sub>2</sub> (pg/ml)            | 219.137±19.141      | 121.756±10.742** | 200.893±20.057      | 123.244±7.196**  | 216.041±19.615       | 144.226±17.947*                | 221.131±39.392       | 169.107±15.094 <sup>n.s.</sup> |
| Uterus PGF <sub>2α</sub> /PGE <sub>2</sub> | 0.635±0.049         | 1.712±0.178**    | 0.550±0.074         | 1.489±0.136**    | 0.519±0.050          | 1.103±0.114**                  | 0.677±0.102          | 0.903±0.120 <sup>n.s.</sup>    |

\*, model group compared with corresponding control group. \*  $p<0.05$ , \*\*  $p<0.01$ .
