# Supplementary material for: The Establishment of a Mouse Model of Recurrent Primary Dysmenorrhea
Source: Int J Mol Sci. 2022 May 30;23(11):6128. doi: 10.3390/ijms23116128 (PMC9181441; doi:10.3390/ijms23116128)
Supplement: Supplementary file 1 [file ijms-23-06128-s001.zip]

Archive with 4 entries (4 files):
- Fig.S1.pdf
- Table S1.pdf
- Table S2.pdf
- Table S3.pdf
